# Supplementary material for: The prognosis of hepatoid adenocarcinoma of the stomach: a propensity score-based analysis
Source: Springer Nature journal article supplement (doi:10.1186/s12885-020-07031-9), 2020-07-17
Supplement: MOESM1 [file 18193158]

Additionalfile1:Table1 Before excluding the patients with M1, clinicopathological characteristics of patients with HAS and Non-HAS treated with radical gastrectomy.

| Factors      | Before propensity matching |                       |         |
|--------------|----------------------------|-----------------------|---------|
|              | Non-HAS<br>n=722<br>No.(%) | HAS<br>N=75<br>No.(%) | P value |
| Sex(M/F)     | 517/205                    | 61/14                 | 0.072   |
| Age (yr)     |                            |                       | 0.785   |
| <45          | 81(11.2%)                  | 7(9.3%)               |         |
| 60>age≥45    | 282(39.1%)                 | 32(42.7%)             |         |
| ≥60          | 359(49.7%)                 | 36(48.0%)             |         |
| Location     |                            |                       | 0.762   |
| U            | 217(30.1%)                 | 25(33.3%)             |         |
| M            | 130(18.0%)                 | 9(12%)                |         |
| L            | 365(50.6%)                 | 41(54.7%)             |         |
| T            | 10(1.4%)                   | 0(0.0%)               |         |
| Surgery type |                            |                       | 0.170   |
| PG           | 9(1.2%)                    | 2(2.7%)               |         |
| DG           | 354(49.0%)                 | 41 (54.7%)            |         |
| TG           | 356(49.3%)                 | 32 (42.7%)            |         |
| TGC          | 3(0.4%)                    | 0 (0.0%)              |         |

|                   |             |             |        |
|-------------------|-------------|-------------|--------|
| Vascular invasion |             |             | 0.272  |
| no                | 327 (45.3%) | 292 (38.7%) |        |
| yes               | 395 (54.7%) | 46(61.3%)   |        |
| T                 |             |             | 0.001  |
| Tis,T0, T1,T2     | 171(23.7%)  | 21 (28.0%)  |        |
| T3                | 263 (36.4%) | 40 (53.3%)  |        |
| T4                | 288 (39.9%) | 14 (18.7%)  |        |
| N                 |             |             | 0.229  |
| N0                | 221 (30.6%) | 11(14.7%)   |        |
| N1                | 155 (21.5%) | 24(32.0%)   |        |
| N2                | 146 (20.2%) | 23 (30.7%)  |        |
| N3                | 200 (27.7%) | 17 (22.7%)  |        |
| M                 |             |             | 0.791  |
| M0                | 711 (98.5%) | 73 (97.3%)  |        |
| M1                | 11 (1.5%)   | 2 (2.7%)    |        |
| EGFR              |             |             | <0.001 |
| -                 | 64 (8.9%)   | 2 (2.7%)    |        |
| +                 | 269 (37.3%) | 7 (9.3%)    |        |
| ++                | 196 (27.1%) | 37 (49.3%)  |        |
| +++               | 193 (26.7%) | 29 (38.7%)  |        |

|                          |             |             |        |
|--------------------------|-------------|-------------|--------|
| Ki-67                    |             |             | 0.003  |
| 0-25%                    | 67 (9.3%)   | 5 (6.7%)    |        |
| 26-50%                   | 169 (23.4%) | 6 (8.0%)    |        |
| 51-75%                   | 212 (29.4%) | 25 (33.3%)  |        |
| 76-100%                  | 274 (38.0%) | 39 (52.05%) |        |
| CEA (ng/ml)              |             |             | <0.001 |
| ≤5                       | 582 (80.6%) | 45 (60.0%)  |        |
| >5                       | 140(19.4%)  | 30 (40.0%)  |        |
| CA199 (u/ml)             |             |             | 0.022  |
| ≤37                      | 614 (85.0%) | 71 (94.7%)  |        |
| >37                      | 108 (15%)   | 4 (5.3%)    |        |
| Her-2                    |             |             | 0.010  |
| -/+                      | 541 (74.9%) | 44 (58.7%)  |        |
| +++                      | 55 (7.6%)   | 10 (13.3%)  |        |
| ++                       | 126 (17.5%) | 21 (28.0%)  |        |
| neoadjuvant chemotherapy |             |             | 0.003  |
| no                       |             |             |        |
| yes                      | 637 (88.2%) | 57 (76.0%)  |        |
|                          | 85 (11.8%)  | 18 (24.0%)  |        |

---
